# Supplementary material for: Study of the Effects of Heating on Organic Matter and Mineral Phases in Limestones
Source: Hindawi journal article supplement (doi:10.1155/2021/9082863), 2021-10-29
Supplement: f1 [file 9082863.f1.docx]

**Supplementary material**

Figure S1 shows the natural surface of the samples that was observed with an optical microscope, Labtronic Scientific (DIN-125). The petrographic description, biomicrite (BC) shows a pink earthy-looking brown color composed of micritic calcite with particles of Fe oxides and hydroxides. Microfossils consist of several foraminifers. Ooids are sub-rounded particles covered with a layer of micrite and Fe minerals. Sample biosparite (BS) has an ocher mottled brown color, consisting of calcite sparite associated with Fe oxides and hydroxides. Microfossils are made of foraminifers and ooids, which appear as round particles. The third type of rock, intramicrite (IM) is constituted of a micritic calcite matrix with many intraclasts, as well as zones of iron minerals. Intraclasts are formed by sub-rounded and rounded particles, composed of micritic and biomicritic calcite, some of them exhibiting a border of micritic mud with iron minerals. Bioclasts consist predominantly of sponge and bryozoan fragments. Fe oxides and hydroxides are associated with micritic matrix zones and fine rounded and sub-rounded particles disseminated in the micritic matrix. In carbonate rocks, the predominant type of porosity is moldic, although IM also exhibits intraparticle porosity. According to the classification of rocks given by Folk (1962), the BC stone corresponds to biomicrite compacted, BS to biosparite, and IM to intramicrite [1].

| 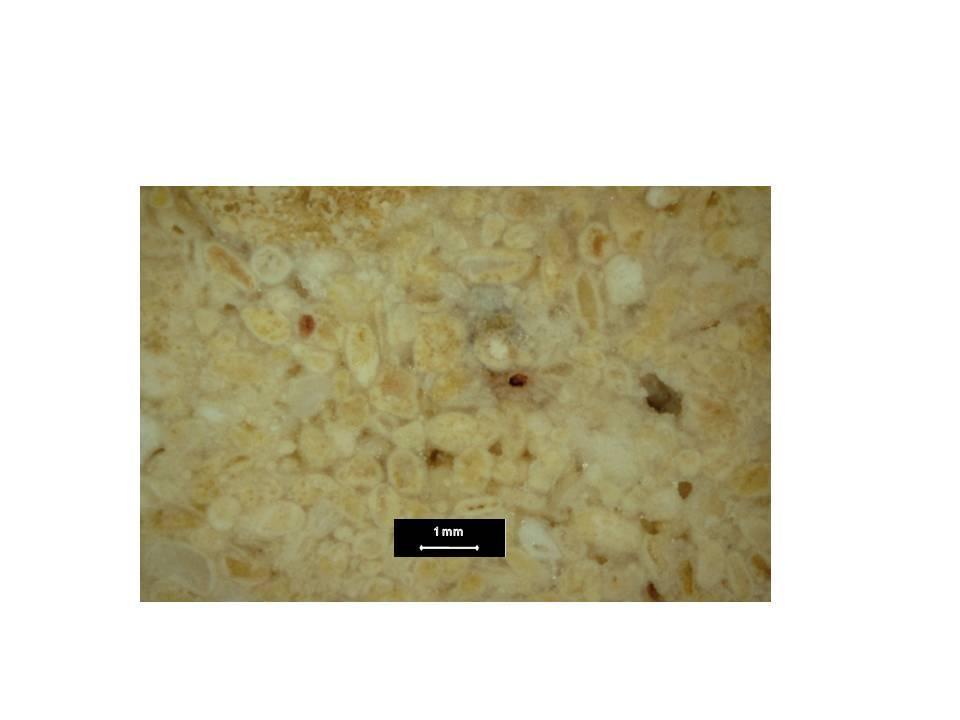  **BC** | 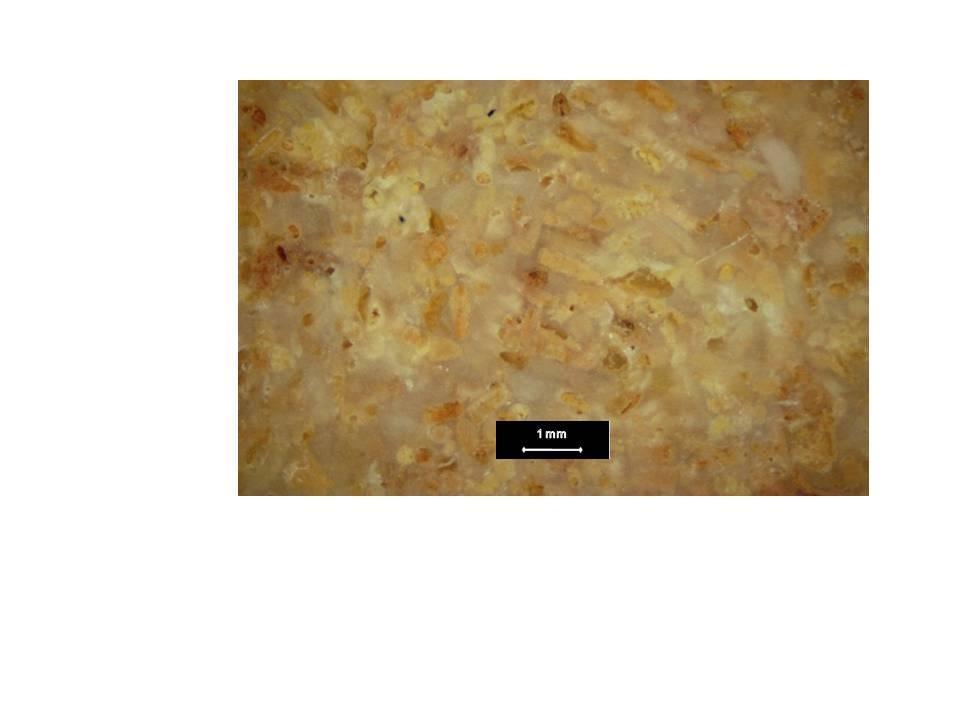  **BS** | 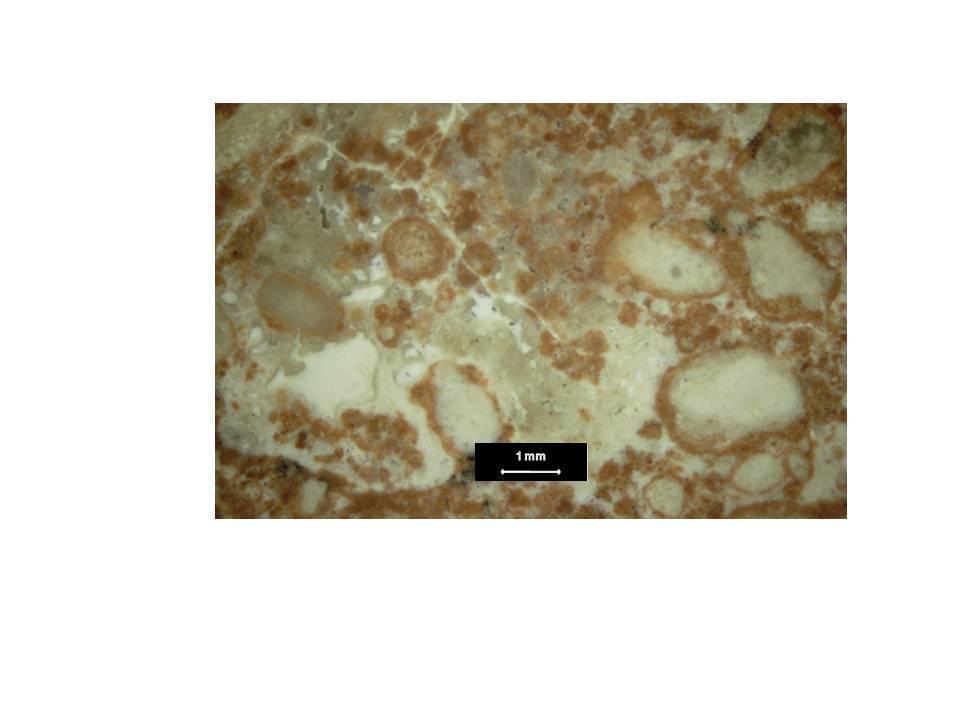  **IM** |
| --- | --- | --- |
| 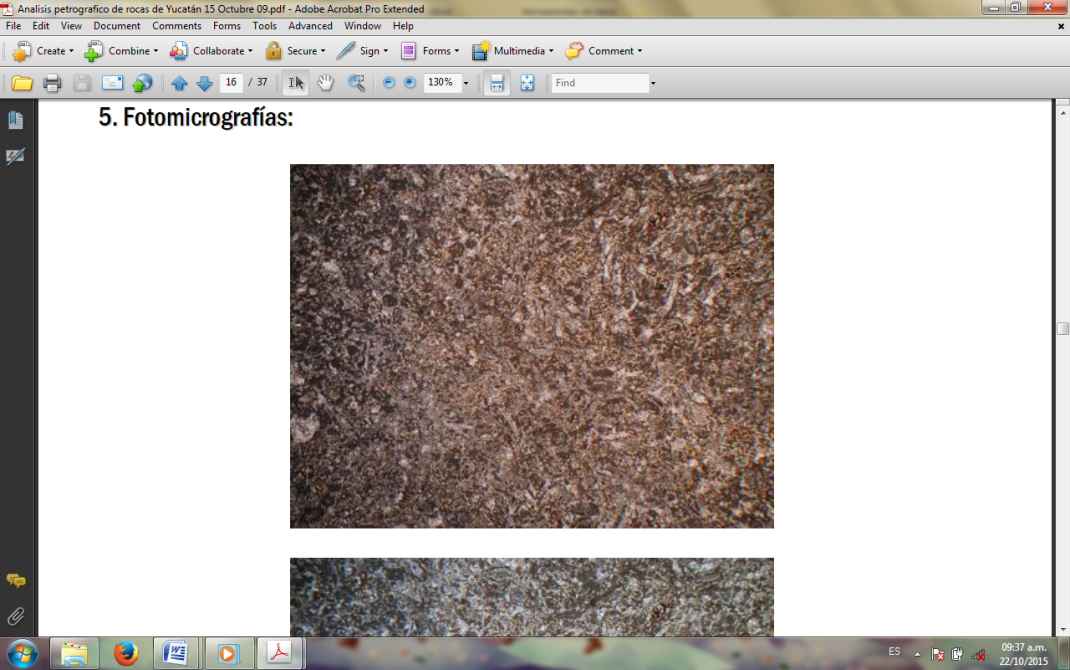  **1mm** | 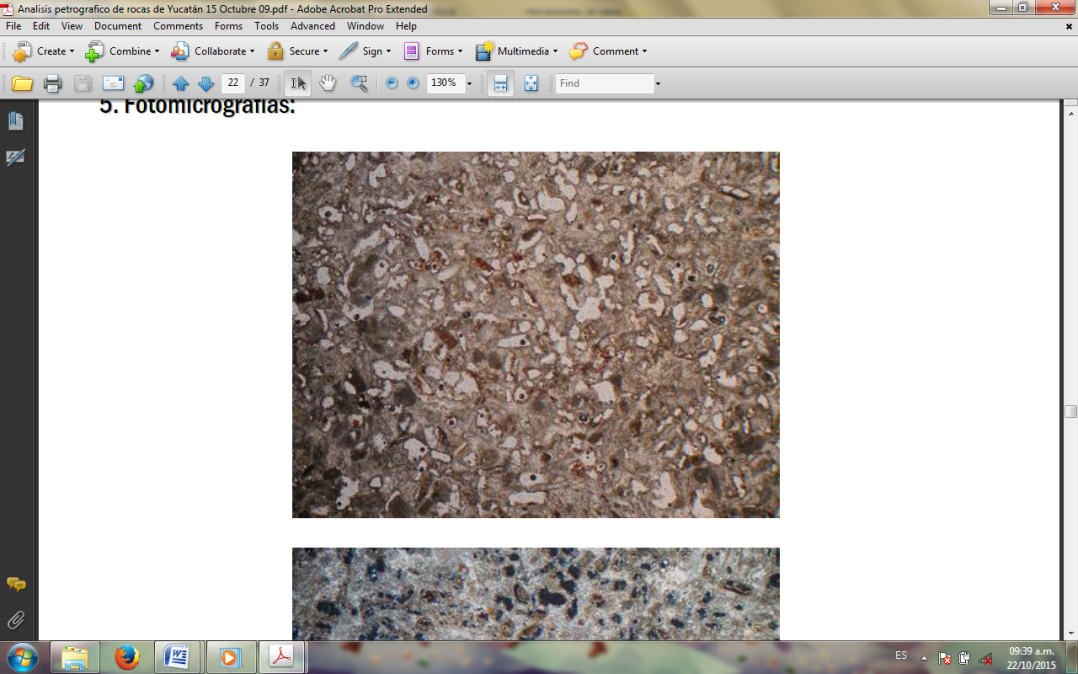  **1mm** | 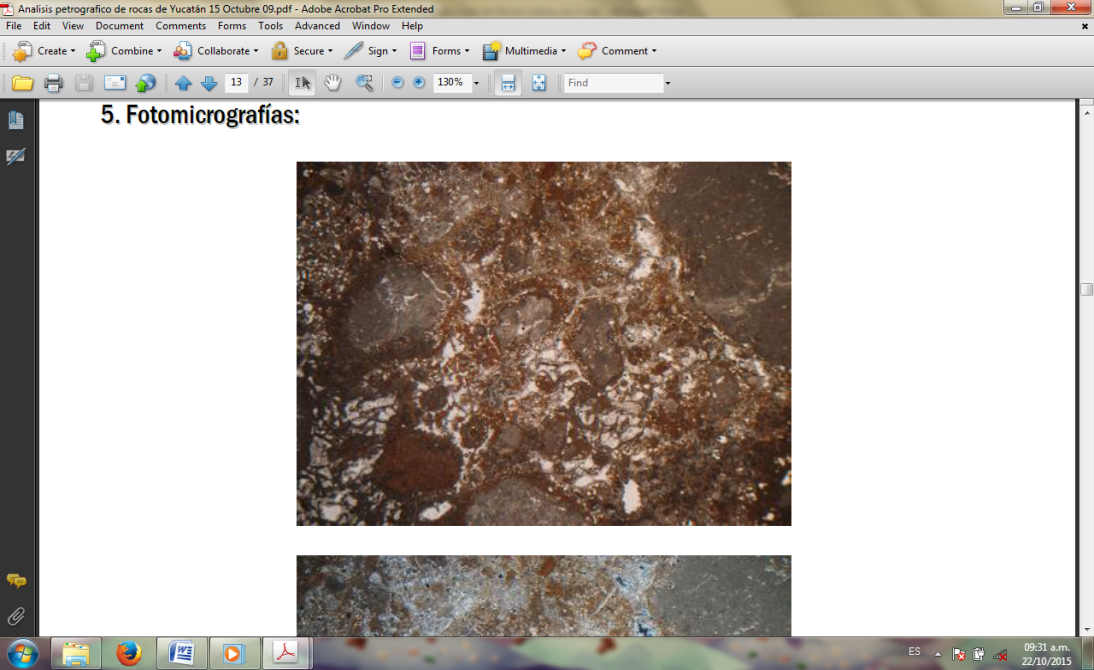  **1mm** |
| 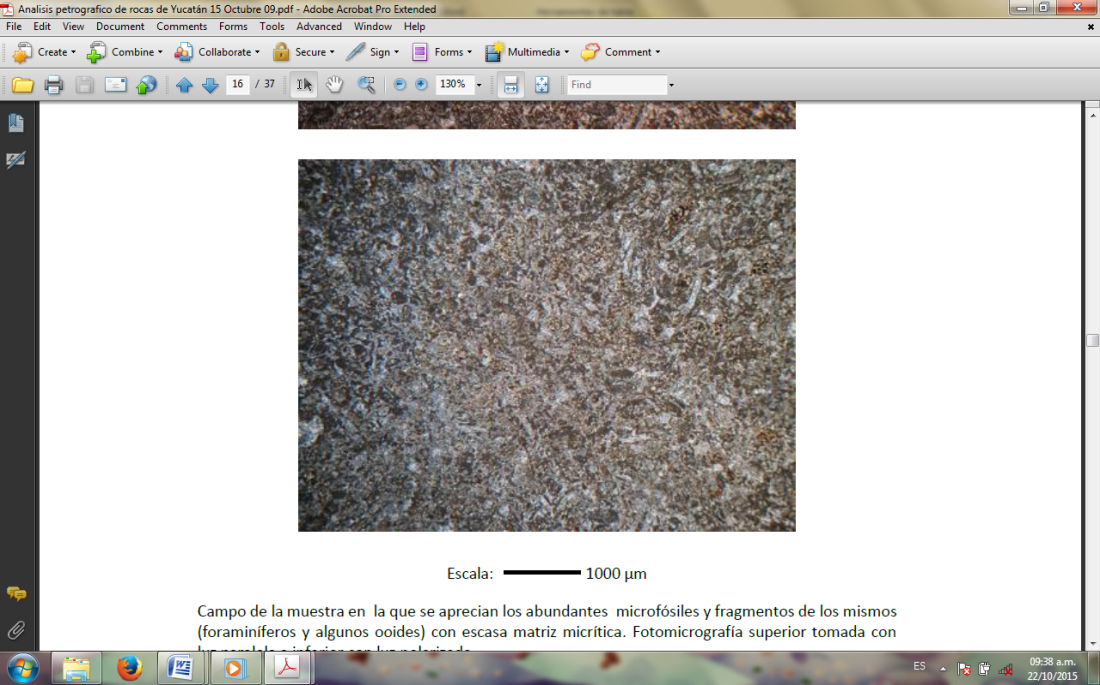  **1mm** | 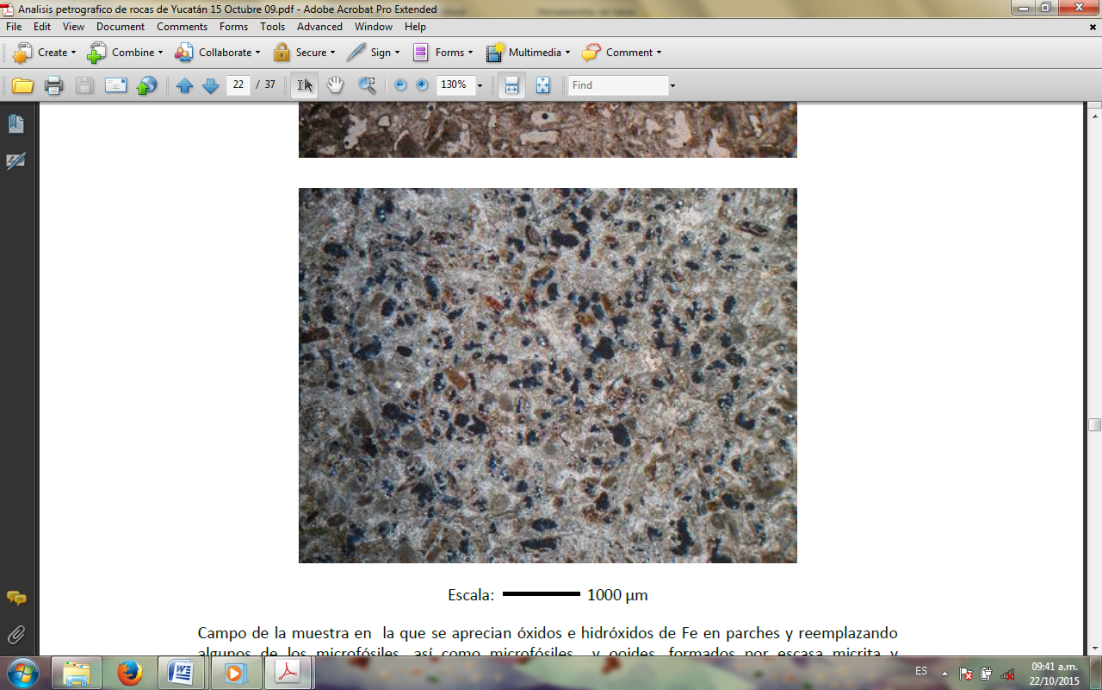  **1mm** | 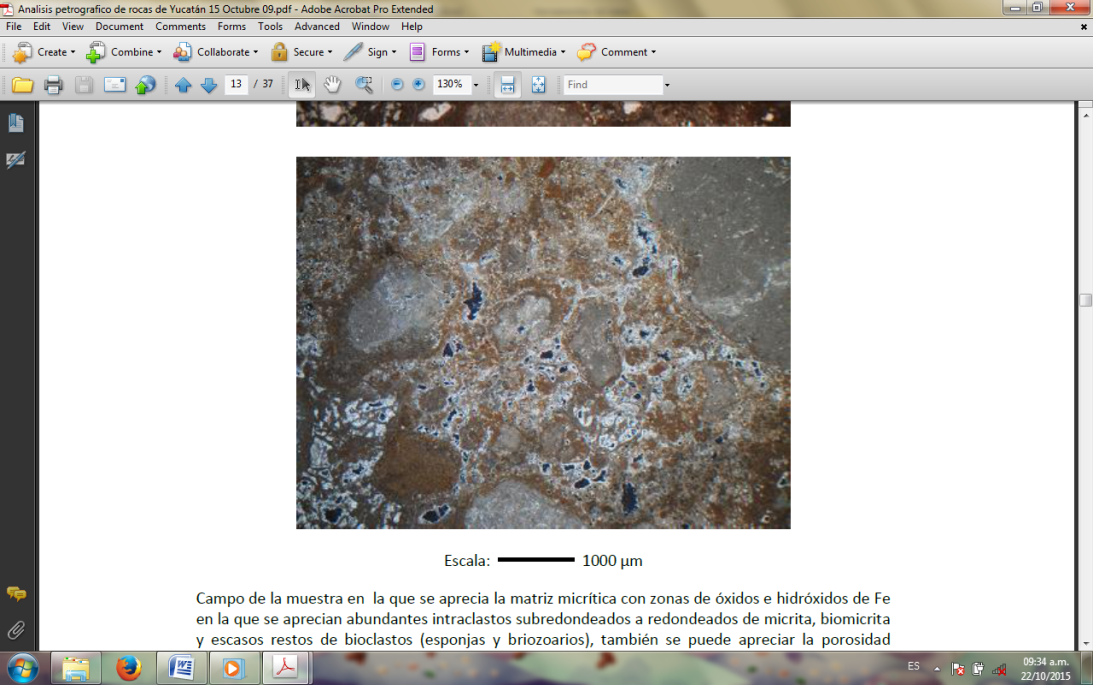  **1mm** |

**Figure S1**. Microscopic optical photographs of the limestone samples (first row). Photomicrographs were taken with two different light polarization states (middle and bottom row).

[1] R. L. Folk, *Petrology of sedimentary Rocks*, Austin Texas: Hemphill Publishing Company, **1980.**

Figure S2 shows the digital camera images of the surfaces of the samples during the sequential thermal treatments. These images allow appreciating qualitatively, the gradual changes of color followed by darkening as the temperature increases due to the changes of the natural pigments.


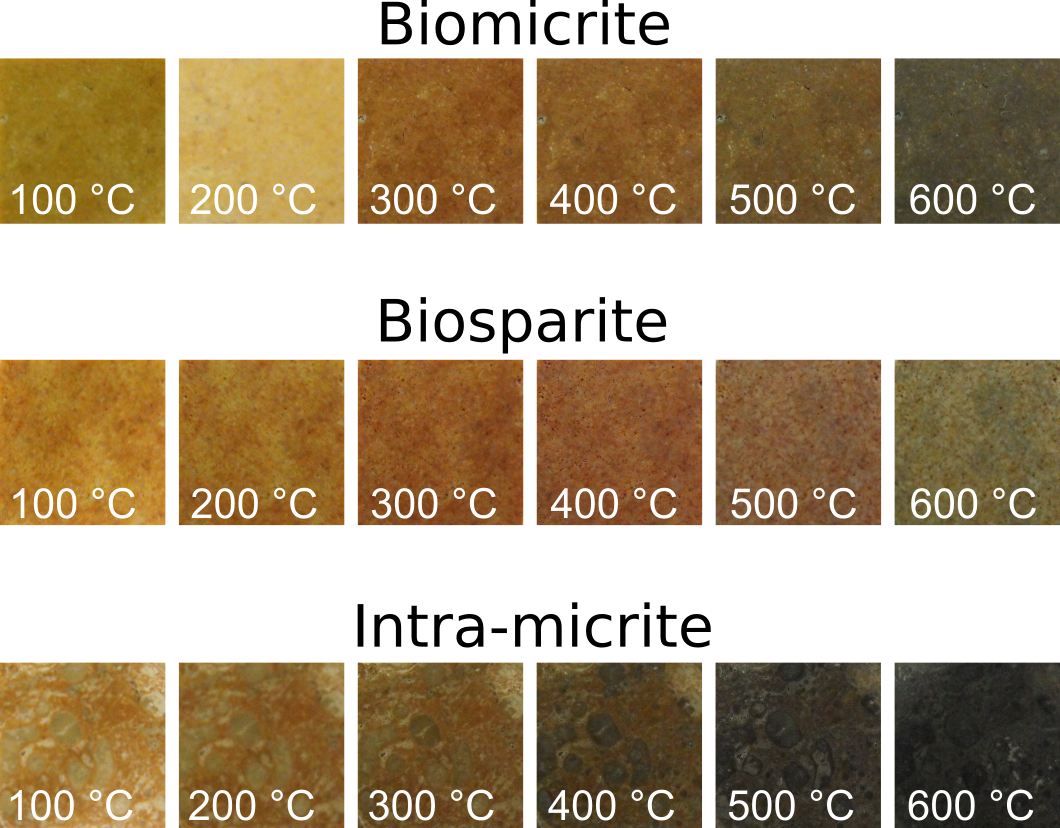


**Figure S2.** Optical images of the surface of the limestone samples for the different thermal treatments.
